# Supplementary material for: Aromatic L-Amino Acid Decarboxylase (AADC) Is Crucial for Brain Development and Motor Functions
Source: PubMed Central journal article supplement (PMC3734303; doi:10.1371/journal.pone.0071741), 2013-08-05
Supplement: pone.0071741.s001.pdf [file pone.0071741.s001.pdf]

**Table S1. Sequences of morpholino oligonucleotides and anti-sense probes for whole-mount in situ hybridization analysis used in this study.**

| <i>Morpholino oligonucleotides</i> |  | <u>Sequence</u>                  |                     |
|------------------------------------|--|----------------------------------|---------------------|
| <i>ddc</i> tMO1                    |  | 5'-TCTCCGAAACTCTGCGGCATCCATC-3'  |                     |
| <i>ddc</i> tMO2                    |  | 5'-TGCGGCATCCATCTTTTAGTAGTGT-3'  |                     |
| Standard MO                        |  | 5'-CCTCTTACCTCACTTTACAATTTATA-3' |                     |
| <i>Antisense probes</i>            |  | <u>NCBI Accession #</u>          | <u>Probe region</u> |
| <i>ddc</i>                         |  | NM_213342.1                      | 111...1553          |
| <i>th</i>                          |  | NM_131149.1                      | 270...1080          |
| <i>huC</i>                         |  | U62018.1                         | 1...1119            |
