# Supplementary material for: Aromatic L-Amino Acid Decarboxylase (AADC) Is Crucial for Brain Development and Motor Functions
Source: PubMed Central journal article supplement (PMC3734303; doi:10.1371/journal.pone.0071741), 2013-08-05
Supplement: pone.0071741.s003.pdf [file pone.0071741.s003.pdf]

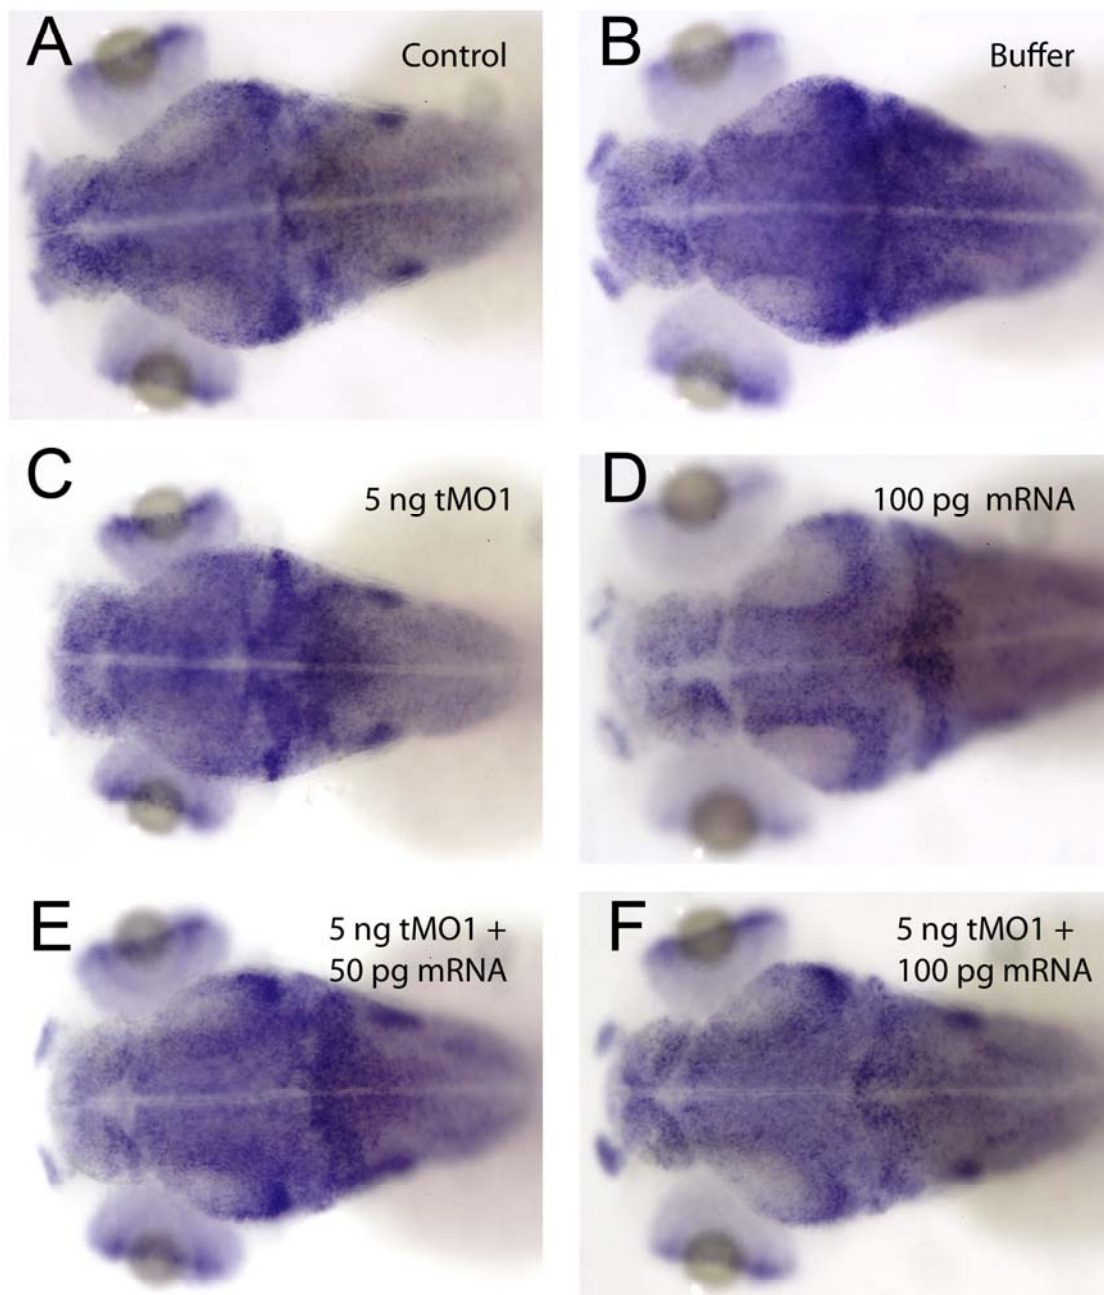

**Fig. S2 *ddc* MO caused reduction in brain size as examined by whole-mount *in situ* hybridization against *huc*.** Embryos were treated as indicated and subjected to whole-mount *in situ* hybridization against *huc*.
